# Supplementary material for: Preconception allergen sensitization can induce B10 cells in offspring: a potential main role for maternal IgG
Source: PubMed Central journal article supplement (PMC5392917; doi:10.1186/s13223-017-0195-8), 2017-04-17
Supplement: 13223_2017_195_MOESM1_ESM.pdf [file 13223_2017_195_MOESM1_ESM.pdf]

## Supplementary material

### Figure S1

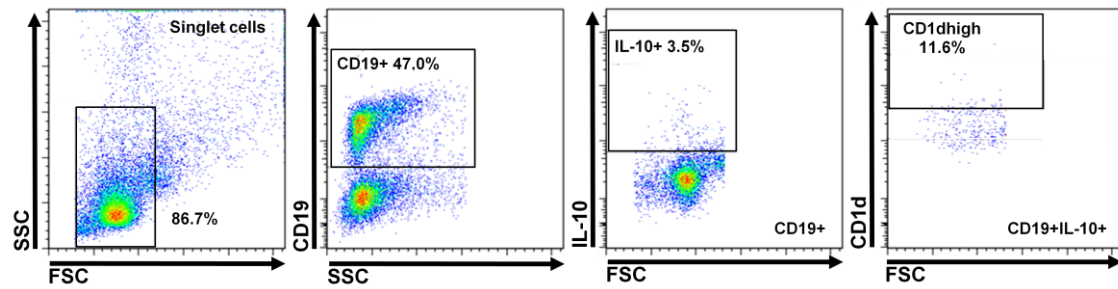

**Figure S1: Illustrative dot plots of gating strategy to identify B cells that produces IL-10 and that express B10 phenotype on offspring spleen.** Each sample was acquired in the singlet cells gate (determined by FSC-A/FSC-H parameters), panels represent gate strategy then in the lymphocytes gate (determined by their relative size/granularity), and then gated as CD19<sup>+</sup> cells (B cells), IL-10 (IL-10<sup>+</sup> B cells) and CD1d<sup>high</sup> cells (B10 cells).
